# Supplementary material for: Visible-light photodetector with enhanced performance based on a ZnO@CdS heterostructure
Source: Royal Society of Chemistry journal article supplement (doi:10.1039/c4tc02890b), 2015-01-01
Supplement: c4tc02890b1.pdf [file c4tc02890b1.pdf]

## Electronic Supplementary Information

# Visible-light photodetector with enhanced performance based on ZnO@CdS heterostructure

Linghui Zhu<sup>a,b</sup>, Chao Li<sup>b</sup>, Yujia Li<sup>a</sup>, Caihui Feng<sup>c</sup>, Feng Li<sup>a</sup>, Dezhong zhang<sup>b</sup>, Zhanguo chen<sup>b</sup>,  
Shanpeng Wen<sup>a,\*</sup>, Shengping Ruan<sup>b,\*</sup>

<sup>a</sup>College of Electronic Science and Engineering, Jilin University, Changchun 130012, P. R. China.

<sup>b</sup>State Key Laboratory on Integrated Optoelectronics, Jilin University, Changchun 130012, P. R. China.

<sup>c</sup> College of Instrumentation and Electrical Engineering, Jilin University, Changchun 130012, P. R. China.

\*Electronic-mail: [sp\\_wen@jlu.edu.cn](mailto:sp_wen@jlu.edu.cn) (S. P. Wen); [ruansp@jlu.edu.cn](mailto:ruansp@jlu.edu.cn) (S. P. Ruan)

Tel: +86-431-85168242

Fax: +86-431-85168270

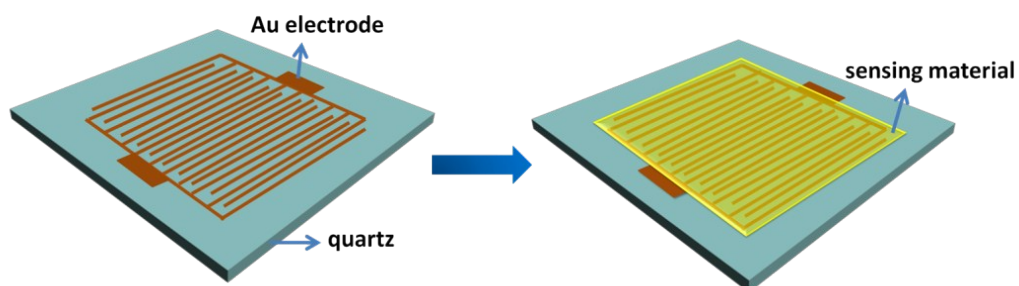

**Fig. S1** Schematic diagram illustrating synthesis procedure of PDs.

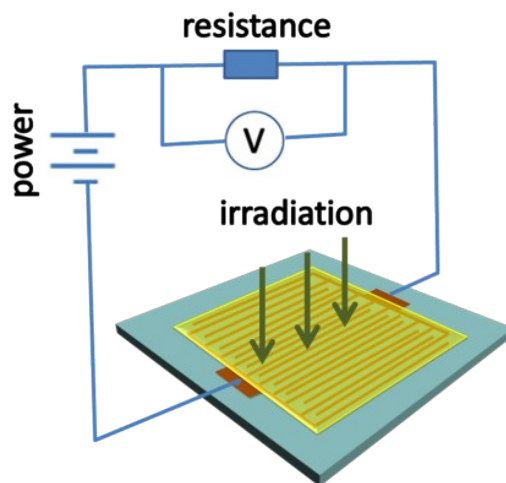

**Fig. S2** The test circuitry for time response of PDs.

### Calculation of the band position

For an inorganic semiconductor, the energy positions of band edges with respect to Absolute Vacuum Scale (AVS) can be calculated as follow:

$$E_C(\text{AVS}) = -\chi + 0.5E_g \quad (1)$$

$$E_V(\text{AVS}) = -\chi - 0.5E_g \quad (2)$$

where  $E_g$  is the band gap of the semiconductor,  $\chi$  is the absolute electronegativity,  $E_C(\text{AVS})$  and  $E_V(\text{AVS})$  is the position of the conduction band edge and the valence band edge with respect to AVS, respectively.

**Table S1** Absolute electronegativity ( $\chi$ ), band gap ( $E_g$ ), energy levels of calculated conduction band edge ( $E_C$ ) and calculated valence band edge ( $E_V$ )

| Semiconductor | $\chi$ (eV) | $E_g$ (eV) | $E_C(\text{AVS})$ (eV) | $E_V(\text{AVS})$ (eV) |
|---------------|-------------|------------|------------------------|------------------------|
| CdS           | 5.18        | 2.4        | -3.98                  | -6.38                  |
| ZnO           | 5.79        | 3.2        | -4.19                  | -7.39                  |

### Reference

1. Y. Xu, and M. A. A. Schoonen, *Am. Mineral.*, 2000, **85**, 543.
